# Supplementary material for: Ordered mesoporous nickel cobaltite spinel with ultra-high supercapacitance
Source: Royal Society of Chemistry journal article supplement (doi:10.1039/c2ta00921h), 2012-12-06
Supplement: c2ta00921h.pdf [file c2ta00921h.pdf]

## Supporting Information for

# Ordered Mesoporous Nickel Cobaltite Spinel with Ultra-high Supercapacitance

Qi Lu,<sup>\*,a,b</sup> Yunpeng Chen,<sup>b</sup> Wanfeng Li,<sup>b</sup> Jingguang G Chen,<sup>c</sup> John Q  
Xiao,<sup>b</sup> and Feng Jiao<sup>\*,a</sup>

<sup>a</sup>*Department of Chemical and Biomolecular Engineering, University of Delaware, Newark, DE 19716, United States*

<sup>b</sup>*Department of Physics and Astronomy, University of Delaware, Newark, DE 19716, United States*

<sup>c</sup>*Department of Chemical Engineering, Columbia University, New York, NY 10027, United States*

Email: [jiao@udel.edu](mailto:jiao@udel.edu); [luqi@udel.edu](mailto:luqi@udel.edu)

Supplementary Figures:

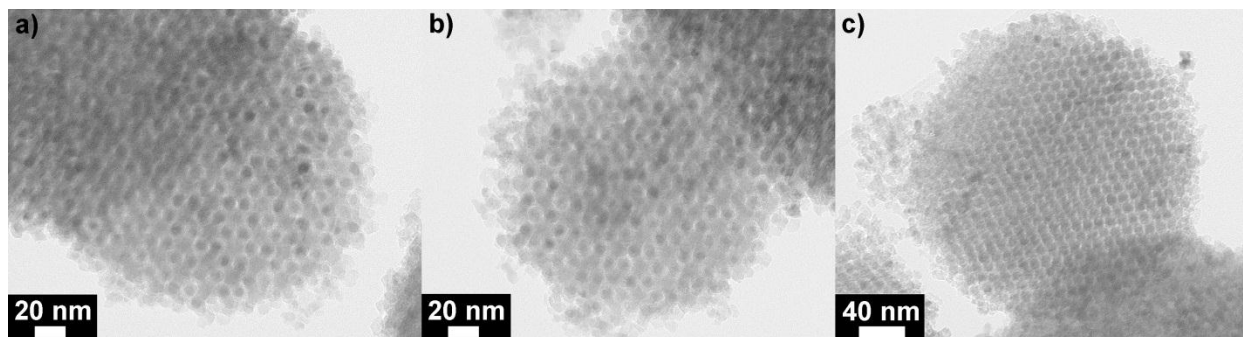

**Figure S1.** TEM images for mesoporous NiCo<sub>2</sub>O<sub>4</sub> prepared at a) 200 °C, b) 250 °C, and c) 300 °C.

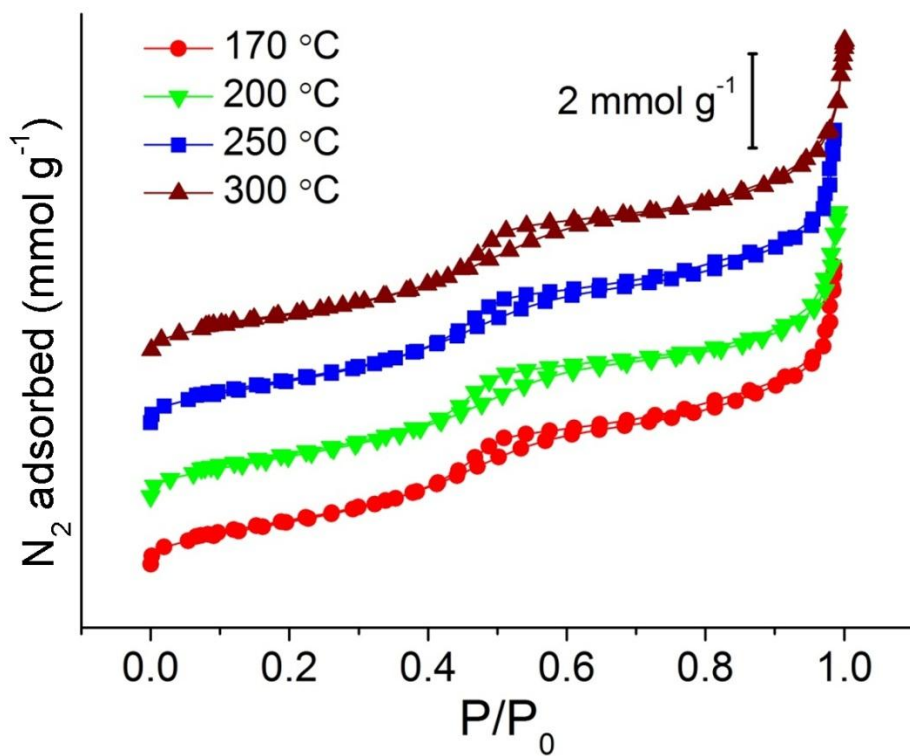

**Figure S2.** N<sub>2</sub> adsorption-desorption isotherms for mesoporous NiCo<sub>2</sub>O<sub>4</sub> synthesized at different temperatures.

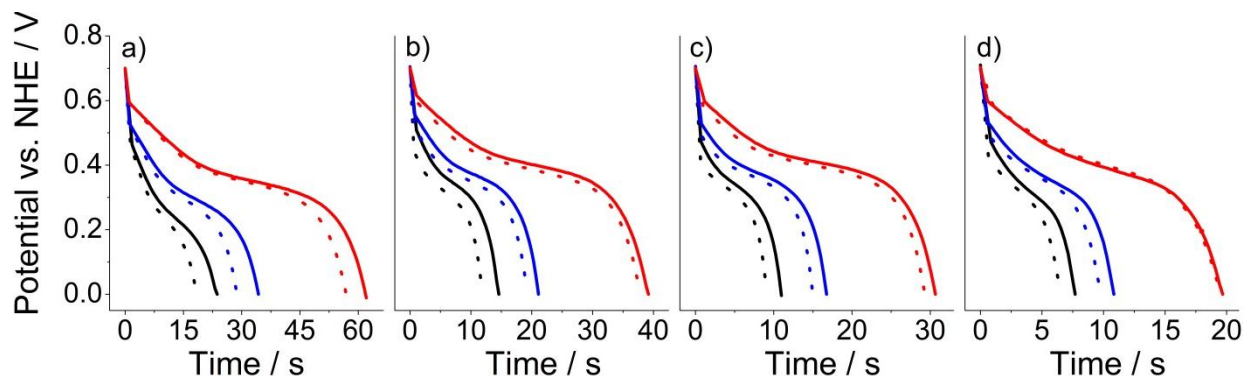

**Figure S3.** Slow-charge and fast-discharge characterizations. a) Cyclic voltammograms with a density of charge currents of  $2.86 \text{ A g}^{-1}$  and various densities of discharge currents (ratio of the charge to the discharge current density: solid lines in red  $2.86/8 \text{ A g}^{-1}$ , in blue  $2.86/14 \text{ A g}^{-1}$ , and in black  $2.86/20 \text{ A g}^{-1}$ ; dotted lines in red  $8/8 \text{ A g}^{-1}$ , in blue  $14/14 \text{ A g}^{-1}$ , and in black  $20/20 \text{ A g}^{-1}$ ).

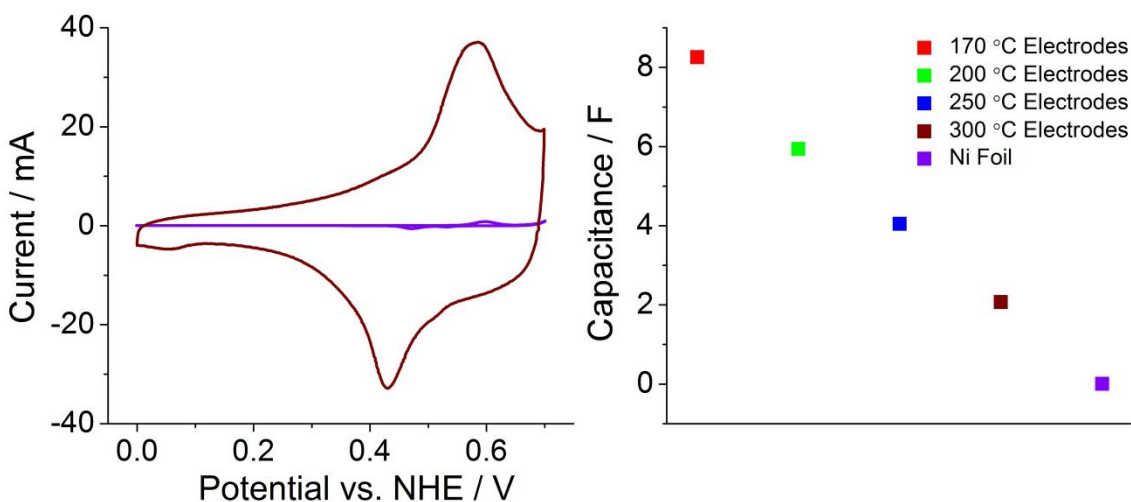

**Figure S4.** Comparison of sample signal from mesoporous NiO electrode material to background signal from the Ni foil. a) Cyclic voltammograms of  $300 \text{ }^\circ\text{C}$  electrodes (red) and bare Ni foil (violet) at potential scanning rate of  $5 \text{ mV s}^{-1}$ . b) Capacitance of electrode material prepared at different temperatures and bare Ni foil calculated from corresponding cyclic voltammograms at  $5 \text{ mV s}^{-1}$ .

**Table S1.** The corrected full width at half maximum (FWHM) of the PXRD peaks used for sample grain size estimation.

| FWHM              | 170 °C  | 200 °C  | 250 °C  | 300 °C  |
|-------------------|---------|---------|---------|---------|
| (220)<br>[degree] | 1.17522 | 0.59047 | 0.54149 | 0.46353 |
| (311)<br>[degree] | 0.99873 | 0.84038 | 0.76151 | 0.64369 |
